# Supplementary material
Source: HighWire-hosted journal article supplement (https://bmjopenquality.bmj.com/highwire/filestream/135996/field_highwire_adjunct_files/1/ds5924.docx)
Supplement: ds5924.docx [file ds5924.docx]

| **I am confident that I know how to refer patients to the liaison team** |
| --- |
|  |
|  |
|  |

| **I am certain of the working hours of the liaison team** |
| --- |
| **I am confident of which type of situations or presentations require a referral to the liaison team** |
| **I am satisfied with the referral procedure** |
